# Supplementary material for: Coriandrum sativum seeds extract mitigate progression of diabetic nephropathy in experimental rats via AGEs inhibition
Source: PubMed Central journal article supplement (PMC6405108; doi:10.1371/journal.pone.0213147), 2019-03-07
Supplement: pone.0213147.s001.pdf [file pone.0213147.s001.pdf]

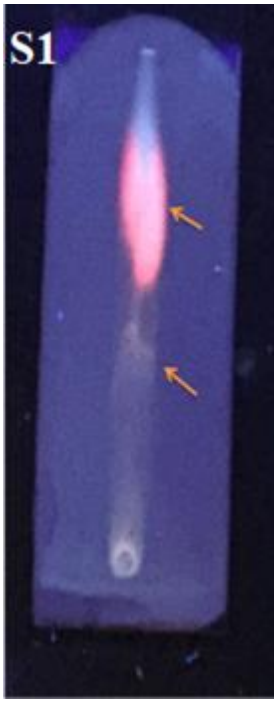

S1 Fig
